# Supplementary material for: Short-term Results of a New Anatomic Stemless Shoulder Arthroplasty- A Prospective Multicentre Study
Source: Research Square preprint supplement (doi:10.21203/rs.3.rs-798358/v1), 2021-10-01
Supplement: Supplementary file 1 [file 6a72a31aafcc13f297daba99.xlsx]

## Sheet: Blatt1
Characteristic	Baseline	3 months	12 months
Constant score (points)	32.1 ±17.6	53.3 ±17.2	72.3 ±17.1
Adjusted Constant score (%)	42.3 ±22.6	70.8 ±23.3	96.1 ±22.8
Pain (points)	3.1 ±3.4	11.0 ±4.2	12.7 ±3.4
Activities of daily living (points)	7.9 ±3.4	14.1 ±4.3	17.9 ±3.4
Strength (points)	6.3 ±7.6	6.8 ±5.8	12.2 ±7.3
Range of motion (points)	14.9 ±7.6	21.4 ±7.8	29.6 ±7.6
